1

1     **Efficient use of genomic information for sustainable genetic improvement in**  
2                                    **small cattle populations**

3

4 J. Obšteter\*, J. Jenko<sup>\*,†</sup>, J. M. Hickey<sup>‡</sup> & G. Gorjanc<sup>‡,#</sup>

5

6 \*Department of Animal Science, Agricultural Institute of Slovenia, Hacquetova ulica 17, 1000

7 Ljubljana, Slovenia

8 †Geno Breeding and A.I. Association, Storhamargata 44, 2317 Hamar, Norway

9 ‡The Roslin Institute and Royal (Dick) School of Veterinary Studies, University of Edinburgh,

10 Easter Bush, Midlothian, EH259RG, United Kingdom

11 #Biotechnical Faculty, University of Ljubljana, Jamnikarjeva 101, 1000 Ljubljana, Slovenia

12

13 Jana Obšteter, Agricultural Institute of Slovenia, Department of Animal Science, Hacquetova ulica

14 17, 1000 Ljubljana, Slovenia

15 +386 1 280 51 34

16 **[jana.obsteter@kis.si](mailto:jana.obsteter@kis.si) (Corresponding Author)**

2

17

## ABSTRACT

18 This paper compares genetic gain, genetic variation, and the efficiency of converting variation into  
19 gain under different genomic selection scenarios with truncation or optimum contribution selection  
20 in a small dairy population by simulation. Breeding programs have to maximize genetic gain but  
21 also ensure sustainability by maintaining genetic variation. Numerous studies showed that genomic  
22 selection increases genetic gain. Although genomic selection is a well-established method, small  
23 populations still struggle with choosing the most sustainable strategy to adopt this type of selection.

24 We developed a simulator of a dairy population and simulated a model after the Slovenian Brown  
25 Swiss population with ~10,500 cows. We compared different truncation selection scenarios by  
26 varying i) the method of sire selection and their use on cows or bull-dams, and ii) selection intensity  
27 and the number of years a sire is in use. Furthermore, we compared different optimum contribution  
28 selection scenarios with optimization of sire selection and their usage. We compared the scenarios  
29 in terms of genetic gain, selection accuracy, generation interval, genetic and genic variance, the rate  
30 of coancestry, effective population size, and the efficiency of converting genetic variation into  
31 genetic gain.

32 The results show that early use of genomically tested sires increased genetic gain compared to  
33 progeny testing as expected from changes in selection accuracy and generation interval. A faster  
34 turnover of sires from year to year and higher intensity increased the genetic gain even further, but  
35 increased the loss of genetic variation per year. While maximizing intensity gave the lowest  
36 conversion efficiency, a faster turn-over of sires gave an intermediate conversion efficiency. The  
37 largest conversion efficiency was achieved with the simultaneous use of genomically and progeny  
38 tested sires that were used over several years. Compared to truncation selection optimizing sire  
39 selection and their usage increased the conversion efficiency by either achieving comparable  
40 genetic gain for a smaller loss of genetic variation or achieving higher genetic gain for a comparable

3

41 loss of genetic variation. Our results will help breeding organizations to implement sustainable

42 genomic selection.

43 Key words: small population, sustainability, genomic selection, optimum contribution selection

4

44

## INTRODUCTION

45 This paper compares genetic gain, genetic variation, and the efficiency of converting variation into  
46 gain under different genomic selection scenarios in a small dairy cattle population with truncation  
47 or optimum contribution selection by simulation. Genomic selection has profoundly changed dairy  
48 cattle breeding programs (Schaeffer, 2006; Garcia-Ruiz et al., 2016; Wiggans et al., 2017). It has  
49 doubled the rate of genetic gain through decreased generation interval, increased selection accuracy  
50 for young animals, increased selection intensity, and identification and management of recessive  
51 lethal alleles (Cole, 2015; Garcia-Ruiz et al., 2016; Wiggans et al., 2017). The prerequisite for these  
52 gains is a large number of genotyped animals, which is an issue for small populations (Thomasen et  
53 al., 2014; Jenko et al., 2017; Ducrocq et al., 2018), though this problem can be addressed with  
54 international training populations (Jorjani, 2012; Liu, 2013; Vandenplas et al., 2017). An effective  
55 implementation also requires an optimal use of genomic selection for different groups of animals  
56 (Thomasen et al., 2014). Further, small populations struggle to maximize selection intensity due to a  
57 limited number of animals and limited resources, but also due to genetic drift and related genetic  
58 variation issues, which can be enhanced with intense and rapid genomic selection (Falconer and  
59 Mackay, 1996; Gorjanc et al., 2018).

60 Breeding programs aim to maximize genetic gain. Previous studies compared the conventional  
61 progeny testing with genomic pre-selection prior to progeny testing or direct genomic selection for  
62 widespread use without progeny testing (de Roos et al., 2011; Lillehammer et al., 2011; Pryce et al.,  
63 2010). These studies reported up to 30% increase in genetic gain with the genomic pre-selection and  
64 up to 195% increase with the direct genomic selection. Thomasen et al. (2014) deterministically  
65 evaluated hybrid schemes that use both progeny and young genomically tested sires in populations  
66 of different size. They concluded that genomic selection gives higher genetic gain than conventional  
67 progeny testing irrespective of population size, but that the hybrid schemes maximize annual  
68 monetary genetic gain when a population is small and accuracy of genomic selection is low.

5

69 Breeding programs also have to maintain genetic variation to ensure long-term sustainability. This  
70 is especially important for small populations, since they have to be competitive in the international  
71 market to justify the national breeding program. While short-term success depends on the genetic  
72 gain in the next few generations, long-term success depends also on maintenance of sufficient  
73 genetic variation to ensure a stable rate of genetic gain (Woolliams et al., 2015). Studies on the  
74 effect of genomic selection on genetic variation have had contradictory results. For example,  
75 Lillehammer et al. (2011) and Pryce et al. (2010) reported a decreased rate of coancestry per year,  
76 while de Roos et al. (2011) reported that it depends on the proportion of genetic variation captured  
77 with markers and a breeding program design. Genomic selection has a potential to decrease the rate  
78 of coancestry due to a more accurate estimation of Mendelian sampling terms for young animals,  
79 which enables differentiation of sibs and avoidance of their co-selection (Daetwyler et al., 2007).  
80 Balancing short- and long-term success can be further enhanced with the optimum contribution  
81 selection (Woolliams et al., 2015).

82 Although genomic selection is a well-established method, small populations still struggle with  
83 choosing a sustainable strategy. The right strategy should ensure short- and long-term success as  
84 well as being economically and logistically viable. To address some of these issues this study  
85 evaluates different genomic breeding program designs for a small dairy population with a focus on  
86 selection and usage of sires and how this affects changes in genetic gain and genetic variation.

6

87

## MATERIAL AND METHODS

88 We compared conventional and different genomic breeding program designs in a small dairy cattle  
89 population with simulation. Altogether we compared twenty-two scenarios. In fifteen scenarios we  
90 used truncation selection with five different selection criteria to choose sires for the insemination of  
91 cows and bull-dams. Additionally, we tested each of the sire selection criterion scenarios within  
92 three sire usage scenarios that varied the number of sires and the period of their usage. To maximize  
93 genetic gain for a given loss in genetic variation we compared the truncation selection scenarios  
94 with seven optimum contribution selection scenarios where we varied balance between genetic gain  
95 and maintenance of genetic variation. We compared all the scenarios in terms of genetic gain,  
96 genetic variation, and efficiency of converting genetic variation into gain.

### 97 *Simulation*

98 We developed a simulator of a realistic dairy population. The simulator is a Python wrapper around  
99 the simulation program AlphaSim (Faux et al., 2016), the genetic evaluation program blupf90  
100 (Miształ et al., 2002), and the optimum contribution selection program AlphaMate (Gorjanc and  
101 Hickey, 2018). The simulator is driven by a set of parameters describing a dairy breeding program,  
102 including the percentage of animals selected at each stage and in each selection path, age at  
103 selection, selection criterion (pedigree or genomic), the number of progeny per sire, years in use,  
104 and the number of selection cycles. These parameters allow the simulation of relevant dairy  
105 breeding programs. In each year the simulator generates phenotypic data, estimates breeding values,  
106 culls, selects and mates animals, and generates progeny - including their pedigree and genotypic  
107 data.

## 108 **Population**

109 The simulated population mimicked the Slovenian Brown Swiss population of ~30,000 animals of  
110 which ~10,500 are cows. The simulation started with a coalescent process to generate a cattle-like  
111 whole-genome sequence for ten chromosomes (Faux et al., 2016; Villa-Angulo et al., 2009). We  
112 randomly sampled segregating sequence variants to construct a set of 10,000 causal variants  
113 (1,000 per chromosome) and two distinct sets of 20,000 marker variants (2,000 per chromosome).  
114 We used the two sets of marker variants to create two SNP arrays, one was used for genomic  
115 selection and the other for monitoring “neutral” diversity. We sampled the effects of causal variants  
116 from a normal distribution with a variance that gave a trait with the heritability of 0.25 in the base  
117 population. We randomly allocated base population animals to different categories to initiate a dairy  
118 breeding program. We have then run a conventional breeding program with selection on phenotype  
119 based estimated breeding values for 20 years, followed by a further 20 years of different scenarios  
120 described below.

121 We generated 4,320 female calves every year of which we removed a random 2% due to stillbirths  
122 and early deaths, and a further 9% due to other losses, for example, reproductive issues. The  
123 remaining heifers were inseminated in the second year and became cows in the third year. In each  
124 subsequent lactation we culled 20% of the cows at random and all remaining cows after the fourth  
125 lactation. This scheme totaled to about 10,500 active cows per year. After the first lactation, we  
126 assigned 43 cows with the highest estimated breeding values as bull-dams. We kept bull-dams in  
127 use for five lactations, which gave us 129 active bull-dams per year. Every year we inseminated the  
128 best 90 bull-dams with relevant sires to generate elite male selection candidates.

129 We selected sires based on genomic or progeny tests. Every year 45 elite male calves were tested  
130 following one of three scenarios: a) progeny test with a pre-selection based on pedigree prediction  
131 (PT), b) progeny test with a pre-selection based on genomic test (GT-PT) or c) genomic test (GT).

8

132 With the PT scenario, 8 out of 27 calves were chosen for progeny test based on pedigree prediction  
133 in their second year, while the remaining 19 calves were used in natural service. With the GT-PT  
134 scenario 8 out of 45 calves were chosen for progeny test based on genomic test. With the PT and  
135 GT-PT scenario 5 out of 8 progeny tested bulls were selected as sires based on estimated breeding  
136 value in their sixth year. With the GT scenario 5 out of 45 genomically tested calves were directly  
137 selected as sires and were used for insemination from their second year onwards. Unselected  
138 genomically tested calves in all genomic scenarios were used as natural service sires.

### 139 ***Breeding value estimation***

140 We estimated breeding values with the pedigree model (Henderson, 1984) or the single-step  
141 genomic model (Legarra et al., 2009) using the blupf90 program with default options (Misztal et al.,  
142 2002). In genomic breeding scenarios we assumed an initial reference population of about 11,000  
143 cows and 100 progeny tested sires. This mimicked the availability of international genomic  
144 evaluation in Brown Swiss (Jorjani, 2012). We updated the reference population each year by  
145 replacing the oldest cows with about 2000 new cows and elite male selection candidates. Variance  
146 components were assumed known and set to simulated values.

### 147 ***Breeding scenarios***

148 We created different truncation selection scenarios by varying i) the method of sire selection and  
149 their use on cows or bull-dams, and ii) selection intensity and the number of years a sire is in use.  
150 Furthermore, we created different optimum contribution selection scenarios with optimization of  
151 sire selection and their usage.

152 ***Truncation selection.*** The scenarios that varied the selection of sires in combination with  
153 their use on cows or bull-dams were: i) PT scenario used PT sires for the insemination of cows and  
154 bull-dams, ii) GT-PT scenario used GT-PT sires for the insemination of cows and bull-dams, iii)



9

155 GT-C scenario used GT sires for the insemination of cows and GT-PT sires for the insemination of  
156 bull-dams, iv) GT-BD scenario used GT sires for the insemination of bull-dams and GT-PT sires for  
157 the insemination of cows, and v) GT scenario used GT sires for the insemination of both cows and  
158 bull-dams. The GT-C and GT-BD scenarios are also referred to as the hybrid scenarios.

159 The scenarios that varied selection intensity and the number of years a sire is in use were: i) select  
160 five sires every year and keep them in use for five years (5 sires/year, use 5 years), ii) reduce  
161 generation interval by using five sires for one year only (5 sires/year, use 1 year) and iii) maximize  
162 selection intensity by selecting only one sire and use it for five years (1 sire/year, use 5 years).

163 ***Optimum contribution selection.*** We have optimized sire selection and usage with optimum  
164 contribution selection (Woolliams et al., 2015) using the AlphaMate program (Gorjanc and Hickey,  
165 2018). Every year we have added the 45 genotyped elite male calves to the pool of sires selected in  
166 the previous generation with a limit of 5 years for sire usage. We then optimized their contributions  
167 while fixing female (heifers' and cows') contributions to one progeny per female. After  
168 optimization we randomly paired the optimized male contributions with the fixed female  
169 contributions. Inputs for optimum contribution selection were estimated breeding values and a  
170 coancestry matrix (Woolliams et al., 2015) from the genomic single-step model (Legarra et al.,  
171 2009). We optimized contributions with different emphasis on genetic gain versus group coancestry  
172 using the target degrees of the angle between the truncation selection solution and an optimum  
173 contribution solution (Kinghorn, 2011). For example, target degrees of 0 maximize genetic gain by  
174 selecting only one male, while target degrees of 90 solely minimize group coancestry. We evaluated  
175 a range of target degrees and reported results for 45, 50, 55, 60, and 75 degrees.

## 176 ***Analysis***

177 We compared the scenarios in terms of genetic gain, selection accuracy, generation interval, genetic  
178 and genic variance, the rate of coancestry, effective population size, and the efficiency of converting

10

179 genetic variation into genetic gain. Genetic gain was expressed as a deviation from average true  
180 breeding values of the individuals in the first generation of comparison in the units of genetic  
181 standard deviation. Selection accuracy was computed as the Pearson correlation between the true  
182 and estimated breeding values. Generation interval was computed as the average age of the parents  
183 at the birth of their selected offspring. Genetic variance measured variance of true breeding values.  
184 Genic variance measured variance of true breeding values under the assumption of no linkage  
185 between causal loci. The rate of coancestry per year was calculated from pedigree or genomic  
186 information. The pedigree coancestry was computed following Wright (1922) from which the rate  
187 of coancestry ( $\Delta C_P$ ) was estimated by regressing  $\log(C_{P,t})$  on the year of birth (Pérez-Enciso, 1995).  
188 The genomic coancestry was computed based on the direct link with heterozygosity,  $Het_t = Het_0(1 -$   
189  $C_t)$  (Falconer and Mackay, 1996). We computed heterozygosity separately for causal, marker, and  
190 neutral loci. We regressed  $\log(C_t)$  on the year of birth to estimate the rate of coancestry for causal  
191 loci ( $\Delta C_Q$ ), marker loci ( $\Delta C_M$ ), and neutral loci ( $\Delta C_N$ ). Effective population size ( $N_e$ ) was estimated  
192 for every measure of the rate of coancestry as  $1/(2\Delta C)$ . Finally, the efficiency of converting genetic  
193 variation into genetic gain was computed as a regression of the achieved genetic gain on the loss of  
194 genic standard deviation (Gorjanc et al., 2018). This metric quantifies the genetic gain achieved in  
195 units of genic standard deviation when all variation is converted into gain or lost due to drift.  
196 Results are presented as the mean of 20 replicates for each scenario on a per year or cumulative  
197 basis. The progeny testing breeding program with 5 sires selected per year and used for 5 years was  
198 the baseline for comparison.

11

199

## RESULTS

200 The results compare different breeding scenarios for a small dairy cattle population in terms of  
201 genetic gain, genetic variation, and the efficiency of converting genetic variation into genetic gain.  
202 The early use of genomically tested sires increased genetic gain compared to progeny testing. A  
203 faster turnover of sires from year to year and higher intensity increased the genetic gain even  
204 further, but increased the loss of genetic variation. The conversion efficiency increased with the  
205 simultaneous use of genomically and progeny tested sires. Maximizing intensity resulted in the  
206 lowest effective population size and the lowest conversion efficiency. A faster turn-over of sires  
207 decreased the conversion efficiency to an intermediate degree. Compared to truncation selection  
208 optimizing male contributions increased the conversion efficiency by either achieving comparable  
209 genetic gain for a smaller loss of genetic variation or achieving higher genetic gain for a comparable  
210 loss of genetic variation.

### 211 *Genetic gain*

212 Early use of genomically tested sires, their faster turn-over and higher intensity of selection  
213 increased genetic gain. This is shown in Table 1, which presents genetic gain by breeding program  
214 and by sire selection and their usage scenario. Genomic pre-selection for progeny testing increased  
215 genetic gain by 37% compared to the baseline. Genomic selection of sires for a direct insemination  
216 of cows or bull-dams increased genetic gain respectively by 63% or 69%, and by 95% when used  
217 for both, cows and bull-dams. Reducing the use of the selected sires from 5 years to 1 year further  
218 increased genetic gain, between 11% and 144% compared to the baseline. Reducing the number of  
219 selected sires per year from 5 to 1 and using that sire for 5 years also increased genetic gain,  
220 between 22% and 126% compared to the baseline, but not compared to the scenario where 5  
221 selected sires per year were used for 1 year. These genetic gains were a direct function of realized  
222 generation intervals (Table S1) and selection accuracies (Table S2).

12

### 223 ***Genetic and genic standard deviation***

224 Early use of genomically tested sires, their faster turn-over and higher intensity of selection  
225 decreased genetic variation. This is shown in Figure 1, which presents genic and genetic standard  
226 deviation by breeding program and by sire selection and their usage scenario. The genic and genetic  
227 standard deviations are expressed as the percentage change to the baseline that had in the final  
228 generation genic standard deviation of 0.97 and genetic standard deviation of 0.94. Genomic  
229 pre selection for progeny test did not significantly change genic standard deviation. Genomic  
230 selection of sires for a direct insemination of cows or bull-dams reduced genic standard deviation  
231 between 1.3% and 2.5%. Reducing the number of years sires were used from 5 to 1 further reduced  
232 genic standard deviation, between 0.9% and 5.0% compared to the baseline. Increasing selection  
233 intensity, by selecting only 1 sire per year instead of 5, reduced genic standard deviation even  
234 further, between 3.0 and 10.3%. We observed a similar trend in the reduction of genetic standard  
235 deviation as for genic standard deviation, but the reductions were overall larger and had higher  
236 variation between simulation replicates.

### 237 ***Effective population size***

238 Early use of genomically tested sires and increased selection intensity decreased effective  
239 population size. This is shown in Table 2, which presents effective population size at causal loci by  
240 breeding program and by sire selection and their usage scenario. Genomic pre-selection for progeny  
241 testing did not significantly change the effective population size. Inseminating cows, bull-dams or  
242 both with young genomically tested sires decreased effective population size respectively by 23%,  
243 29%, and 45%. Reducing the years the sires are used from 5 to 1 did not significantly change  
244 effective population size, except when both cows and bull-dams were inseminated with genomically  
245 tested sires (-59% compared to the baseline and -20% compared to the corresponding scenario with  
246 5 year usage). In contrast, reducing the number of sires selected per year from 5 to 1 and using that  
247 sire for 5 years decreased effective population size for all scenarios. The decrease ranged from 40%

13

248 (with genomic pre-selection for progeny testing) to 76% (when both cows and bull-dams were  
249 inseminated with one genomically tested sire). These results were qualitatively the same as results  
250 for the effective population sizes at marker loci used for genomic selection or at “neutral” loci  
251 (results not shown).

### 252 ***Efficiency of converting genetic variation into gain***

253 The greatest efficiency of converting genetic variation into gain was achieved with the simultaneous  
254 use of genomically and progeny tested sires that were used over several years. This is shown in  
255 Table 3, which presents the efficiency of converting genetic variation into gain by breeding program  
256 and by sire selection and their usage scenario. The efficiency indicates long-term genetic gain in  
257 standard deviation units when all genic variance will be exhausted. This calculation is based on the  
258 linear regression of achieved genetic gain on lost genic variance over the 20 years of selection,  
259 which we graphically represent in Figure 2 to complement the Table 3. Compared to the baseline,  
260 the introduction of genomic selection increased the efficiency. The highest increase, 33%, was  
261 achieved with the genomic pre-selection for progeny testing. Genomic selection of sires for the  
262 insemination of cows or bull-dams increased the efficiency respectively by 30% or 25%. Genomic  
263 selection of sires for the insemination of both cows and bull-dams did not significantly increase the  
264 efficiency compared to the baseline. Reducing the usage of sires from 5 years to 1 year decreased  
265 the conversion efficiency, except for the two scenarios with the highest genetic gain, that is, when  
266 using genomically tested sires for the insemination of bull-dams or all females. Reducing the  
267 number of selected sires per year to 1 and using it for 5 years reduced efficiency furthermore.

### 268 ***Optimum contribution selection***

269 Optimization of male contributions increased the efficiency of converting genetic variation into  
270 genetic gain compared to truncation selection. This is shown in Table 4 and Figure 3, which  
271 compare scenarios with truncation selection and optimum contribution selection. Optimization

14

272 increased the efficiency of converting genetic variation into genetic gain when we increased  
273 emphasis on maintenance of genetic variation. Therefore, there was always an optimum  
274 contribution selection scenario that either achieved comparable genetic gain as a truncation  
275 selection scenario, but with a smaller loss in genetic variation, or achieved larger genetic gain than a  
276 truncation selection scenario with a comparable loss in genetic variation. For example, optimum  
277 contribution selection with the target degrees of 75 achieved 22% higher genetic gain with a  
278 comparable rate of coancestry as the truncation selection scenario that used 5 progeny tested sires  
279 for 5 years, which taken together resulted in 117% higher conversion efficiency. Similarly, optimum  
280 contribution selection with the target degrees of 55 and 60 degrees achieved comparable genetic  
281 gain of the truncation selection scenario that used 5 genomically tested sires for 5 years on cows  
282 and bull-dams, but had slightly smaller rates of coancestry, which taken together increased  
283 conversion efficiency by respectively 42 and 58%. On the other hand, optimum contribution  
284 selection with the target degrees of 50 achieved a 58% higher genetic gain with a comparable rate  
285 of coancestry as the truncation selection scenario that used 5 genomically tested sires for 5 years.  
286 Further, optimum contribution selection with the target degrees of 45 and 50 had comparable  
287 genetic gain as the truncation selection scenario that used 5 genomically tested sires for 1 year on  
288 both, cows and bull-dams. While optimization at 45 degrees was comparable to the truncation  
289 scenario in all measures, optimization at 50 degrees had a 16% higher conversion efficiency.  
290 Increasing the emphasis on maintenance of genetic variation in optimization increased the number  
291 of selected sires and their usage over time. The average number of used sires ranged from 9.6 with  
292 the target degrees of 45 to 153.0 with the target degrees of 75. The years of usage ranged from 1.6  
293 to 4.9 for the same span of target degrees.

15

294

## DISCUSSION

295 Selection dynamics in small populations differs from that of large populations. Small populations  
296 can not perform very intensive selection due to limited resources that allow for testing of only  
297 limited number of individuals. Further on, due to limited number of animals and progeny per sire,  
298 small populations struggle with the accuracy of progeny and genomic testing. And last, limited  
299 accuracy and limited number of available animals could potentially affect genetic variation of the  
300 population. Despite all this, small populations have to find a way to deliver both short- and long-  
301 term genetic gain to stay competitive with larger populations and to justify domestic selection. The  
302 results show that we can increase genetic gain in such populations by implementing the genomic  
303 selection of sires, a faster turn-over of sires, and increasing the intensity of sire selection. However,  
304 these strategies also increase the loss of genetic variation, though this loss has to be assessed against  
305 the larger genetic gains. For this reason, we evaluated the efficiency of converting genetic variation  
306 into genetic gain and the results show that in small dairy populations the conversion efficiency can  
307 be improved by the simultaneous use of genomically and progeny tested sires. Optimization of male  
308 contributions can further increase the conversion efficiency. Specifically, it can increase the genetic  
309 gain of the truncation selection with a comparable loss of genetic variation or it can reduce the loss  
310 of genetic variation with a comparable genetic gain. To address these main findings, we divided  
311 discussion into three parts: i) how genomic truncation selection affects genetic gain in small  
312 populations and how this compares to large populations; ii) how genomic truncation selection  
313 affects the loss of genetic variation in small populations; and iii) how optimum contribution  
314 selection can increase the conversion efficiency, which has implications for small and large  
315 populations.

### 316 *Genetic gain with genomic truncation selection*

317 As expected, genomic selection increased the genetic gain in all sire selection and usage scenarios.  
318 This was due to a higher selection accuracy for young non-phenotyped animals and reduced

16

319 generation interval (Schaeffer, 2006). Using genomic prediction as the pre-selection step increased  
320 genetic gain between 37% and 59% in different scenarios without reducing generation interval. This  
321 is a larger increase than in studies of larger populations (Pryce et al., 2010) or larger progeny groups  
322 (Lillehammer et al., 2011). In small populations additional benefit of genomic pre-selection comes  
323 from the fact that progeny testing is not as accurate as in large populations due to smaller progeny  
324 groups. Reducing the generation interval by using young genomically tested sires directly on cows  
325 and bull-dams further increased genetic gain between up to 144% when we used 5 sires per year  
326 and up to 126% when we maximized intensity and used only 1 sire per year. These results are  
327 largely in concordance with Pryce et al. (2010), Lillehammer et al. (2011) and de Roos et al. (2011),  
328 although these studies evaluated typical large cattle populations with about ten-times larger number  
329 of selection candidates.

330 Thomasen et al. (2014) argued that the benefit of genomic selection in small dairy populations is  
331 undermined by a limited selection accuracy for young non-phenotyped animals caused by a small  
332 reference population. A small reference population will invariably lead to inaccurate genomic  
333 predictions. In this study we achieved comparable accuracies of about 0.8 with limited progeny test  
334 and with genomic prediction based on a reference population of about 11,000 cows and 100  
335 progeny tested sires, that was updated each year. Recent drops in prices for genome-wide  
336 genotyping should enable small dairy populations to build such reference populations. Further,  
337 some phenotyping resources could be diverted to genotyping to maximize return on investment. A  
338 comparable level of accuracy can be also achieved with international reference populations (Jorjani,  
339 2012; Špehar et al., 2013) or a combination of national and international reference populations  
340 (Vandenplas and Gengler, 2015; Vandenplas et al., 2017; Vandenplas et al., 2018). When this level  
341 of accuracy is combined with a reduced generation interval, small populations can achieve  
342 substantially larger genetic gains than with progeny testing. Finally, increasing the selection  
343 intensity to the unrealistic use of just one sire, to come closer to the intensity of selection in large



17

344 populations, further increased genetic gain, but with a considerable loss in genetic variation that  
345 started to limit genetic gain within the simulated 20 years.

### 346 ***Loss of genetic variation with genomic truncation selection***

347 The results show that small populations can increase genetic gain without increasing the loss of  
348 genetic variation by using genomic pre-selection of bulls for progeny testing. All other genomic  
349 selection scenarios increased the loss of genetic variation compared to a conventional scenario with  
350 progeny testing, although the accuracies of progeny and genomic tests were comparable and that we  
351 selected the same number of sires per year. We observed this with genic and genetic variance as  
352 well as effective population size, as measured with pedigree and neutral, marker or causal loci.  
353 While losses of genic and genetic variance in the simulated period of 20 years do not seem  
354 substantial (at most 0.13 genic standard deviation), the changes in effective population size were  
355 substantial – from about 175 with the conventional scenarios to about 80 with the full genomic  
356 scenarios. The differences in effective population size indicate long-term sustainability of the  
357 different breeding scenarios.

358 Our results for the rate of coancestry are not in concordance with what was observed in studies of  
359 large populations (Pryce et al., 2010) or with higher selection intensity (Lillehammer et al., 2011).  
360 which observed lower rates with genomic selection. However, lower intensity of selection in small  
361 populations stems from fewer tested animals, and not more selected, which reduces a genetic pool  
362 for selection. Our results are more in line with Doekes et al. (2018). They attribute the higher rates  
363 of inbreeding with genomic selection to the fact, that the animals with a higher relatedness to the  
364 reference population have more accurate genomic predictions and are more likely to deviate  
365 substantially and therefore to be selected (Habier et al., 2007; Clark et al., 2012). Another  
366 explanation for a larger loss of genetic variability with genomic selection is that shortening  
367 generation interval increases the turnover of germplasm from year to year, which increases genetic

18

368 gain per unit of time, but also increases the loss of genetic variation per unit of time (Boichard et al.,  
369 2015; Gaynor et al., 2016; Gorjanc et al., 2018). Further, studies mostly report the rate of  
370 inbreeding, which measures increase in individual homozygosity (Pryce et al., 2010; Doekes et al.  
371 2018), while we report the rate of coancestry, which measures increase in population homozygosity.  
372 While these two measures are correlated, the rate of coancestry determines the sustainability of a  
373 breeding program.

374 To compare the simultaneous change in genetic gain and loss in genetic variation we compared  
375 different scenarios with the efficiency of converting genetic variation into genetic gain. We  
376 measured this with a linear regression of the achieved genetic gain on the lost genetic standard  
377 deviation (Gorjanc et al., 2018). We found that in small cattle populations genomic pre-selection for  
378 progeny test and hybrid scenarios achieved the highest conversion efficiencies. The two extremes –  
379 conventional and complete genomic scenarios – were the least efficient. The conventional scenario  
380 had low conversion efficiency due to a small genetic gain (caused by long generation intervals)  
381 although it retained most of genetic variation. The low conversion efficiency of the conventional  
382 scenarios could be specific to small populations, since the accuracy and selection intensity of  
383 progeny testing is smaller than in large populations. The completely genomic scenario had low  
384 conversion efficiency despite a large genetic gain (caused by short generation intervals) as it lost the  
385 most of genetic variation.

386 Increasing the turnover of the sires and increasing selection intensity have different consequences  
387 on short and long-term success of selection. Although both of these scenarios increase genetic gain,  
388 increasing the intensity also increased the loss of genetic variation and in turn reduced conversion  
389 efficiency. Increased turn-over of sires from 5 to 1 year in this study achieved higher genetic gain  
390 over the 20 years than reducing the number of sires from 5 to 1, because it did not impact genetic  
391 variation so severely.

19

## 392 ***Comparison of truncation and optimum contribution selection***

393 Optimization of male contributions increased the conversion efficiency of truncation selection  
394 scenarios. The optimization involved all active males - the young calves with genomic prediction  
395 and sires selected in previous years – either young sires with genomic test or older with progeny  
396 test. Optimum contribution selection with genomic information has been tested before (e.g. Clark et  
397 al., 2013) with the conclusion that there is not much scope for optimization with genomic  
398 relationships unless there are very large full-sib families. Here we use optimal contribution selection  
399 to optimize selection and usage of genomically and progeny tested bulls across generations and  
400 observe substantial differences over 20 years in a small dairy population. We achieved this by  
401 optimizing male contributions with a range of emphasis on genetic gain versus maintenance of  
402 genetic variation. In this we followed the multi-objective approach of Kinghorn (2011), where the  
403 emphasis is measured with the angle between truncation selection solution and targeted optimum  
404 contribution selection solution.

405 For every truncation selection scenario, we found an optimum contribution selection scenario that  
406 increased conversion efficiency. This higher efficiency was either achieved with the same genetic  
407 gain but smaller loss of genetic variation than truncation selection or with a higher genetic gain and  
408 the same loss of genetic variation as truncation selection. This improvement was achieved by  
409 optimized selection and usage of sires. For example, the average number of sires with the truncation  
410 selection of 5 progeny tested sires that were used for 5 years was about 55 (this includes young,  
411 natural service and proven bulls). Here the sires of the same age and the same status had an  
412 approximately the same number of progeny. This scenario achieved genetic gain of 2.50 genetic  
413 standard deviations, generation interval for sire-sire and sire-dam paths of 9.0 and 7.0 years,  
414 effective population size of 172 and conversion efficiency of 77. A comparable number of sires (49)  
415 was used with the optimization targeting 60 degrees, which involved mostly young sires (3 years in  
416 use). Their optimized usage delivered genetic gain of 4.77 genetic standard deviations, generation

20

417 interval for sire-sire and sire-dam paths of 3.3 and 3.1 years, effective population size of 144 and  
418 conversion efficiency of 126. The highest genetic gain was achieved with the targeted degrees  
419 between 45 and 50. These targets drive optimization to achieve every year between 71% and 65%  
420 of maximum possible genetic gain with truncation selection and between 71% and 77% minimum  
421 possible group coancestry (Kinghorn, 2011; Gorjanc and Hickey, 2018). Further, although the  
422 optimization could choose genomically and progeny tested bulls, we observed that it chose mostly  
423 young genomically tested bulls, for example the maximum years in use was on average 4.9 when  
424 we optimized for 75 target degrees. This is in contrast with truncation selection scenarios, where the  
425 highest conversion efficiency was achieved with the simultaneous use of genomically and progeny  
426 tested bulls.

427 The results have implications also for large populations, namely they show that genomic selection is  
428 increasing turnover of germplasm per year with positive effect on genetic gain and negative effect  
429 on genetic variation. This has been already indicated in real large populations (Doekes et al., 2018).  
430 While our results are likely specific to small populations, combining these with the results from a  
431 wheat simulation study (Gorjanc et al., 2018) that used a small or a large number of parents suggest  
432 that both small and large populations can increase the conversion efficiency of genomic selection by  
433 optimizing contributions.

## 434 **CONCLUSION**

435 This paper evaluated different genomic breeding programs in a small dairy cattle population with  
436 truncation selection to quantify its short- and long-term success. Furthermore, it evaluated the value  
437 of optimizing male contributions to increase efficiency of converting genetic variation into genetic  
438 gain. We concluded that genomic selection increases short-term genetic gain, but can also improve  
439 long-term genetic gain when used in combination with conventional selection. We also showed that  
440 optimum contribution selection improves conversion efficiency at a comparable genetic gain or

21

441 achieves higher genetic gain at a similar conversion efficiency. Our results will be of help to

442 breeding organization that aim to implement sustainable genomic selection.

22

## ACKNOWLEDGMENTS

443

444 The authors acknowledge T. Perpar (Agricultural Institute of Slovenia), M. Rigler (Chamber of  
445 Agriculture and Forestry of Slovenia), and K. Potočnik (Biotechnical Faculty, University of  
446 Ljubljana) for their advice about the Brown-Swiss breeding scheme and Andres Legarra (INRA)  
447 and Ivan Pocrnic (University of Georgia) for their advice about preparing the single-step coancestry  
448 matrix. The first author also thanks the European Association for Animal Production (EAAP) for  
449 scholarship to present preliminary results of this study at the 2018 annual meeting.

## APPENDIX

450 Table S1: Generation interval by path of selection, by breeding program and by sire selection and  
451 their usage scenario.

| Breeding program | Sire selection and usage            |                                    |                                    |                                    |                                    |                                    |
|------------------|-------------------------------------|------------------------------------|------------------------------------|------------------------------------|------------------------------------|------------------------------------|
|                  | 5 sires/year, use 5 years           |                                    | 5 sires/year, use 1 year           |                                    | 1 sire/year, use 5 years           |                                    |
|                  | Sire of sires                       | Sire of dams                       | Sire of sires                      | Sire of dams                       | Sire of sires                      | Sire of dams                       |
| PT               | 9.0 <sub>0.06</sub> <sup>ab,A</sup> | 7.0 <sub>0.05</sub> <sup>a,A</sup> | 7.1 <sub>0.00</sub> <sup>a,B</sup> | 5.8 <sub>0.02</sub> <sup>a,B</sup> | 9.1 <sub>0.07</sub> <sup>a,C</sup> | 7.7 <sub>0.00</sub> <sup>a,C</sup> |
| GT-PT            | 9.0 <sub>0.06</sub> <sup>a,A</sup>  | 7.0 <sub>0.05</sub> <sup>a,A</sup> | 7.1 <sub>0.00</sub> <sup>a,B</sup> | 5.8 <sub>0.00</sub> <sup>a,B</sup> | 9.1 <sub>0.07</sub> <sup>a,C</sup> | 7.7 <sub>0.02</sub> <sup>a,C</sup> |
| GT-C             | 9.0 <sub>0.05</sub> <sup>b,A</sup>  | 4.1 <sub>0.04</sub> <sup>b,A</sup> | 7.1 <sub>0.00</sub> <sup>a,B</sup> | 2.5 <sub>0.00</sub> <sup>b,B</sup> | 9.1 <sub>0.06</sub> <sup>a,C</sup> | 4.1 <sub>0.00</sub> <sup>b,A</sup> |
| GT-BD            | 3.8 <sub>0.05</sub> <sup>c,A</sup>  | 7.0 <sub>0.05</sub> <sup>c,A</sup> | 3.8 <sub>0.05</sub> <sup>b,A</sup> | 5.7 <sub>0.00</sub> <sup>c,B</sup> | 3.8 <sub>0.04</sub> <sup>b,A</sup> | 7.6 <sub>0.00</sub> <sup>c,C</sup> |
| GT               | 4.2 <sub>0.05</sub> <sup>d,A</sup>  | 3.9 <sub>0.05</sub> <sup>d,A</sup> | 2.3 <sub>0.05</sub> <sup>c,B</sup> | 2.3 <sub>0.00</sub> <sup>d,B</sup> | 4.2 <sub>0.07</sub> <sup>c,A</sup> | 3.9 <sub>0.00</sub> <sup>d,C</sup> |

452 PT = conventional progeny testing; GT-PT = genomic pre-selection of bulls for progeny testing, GT-C = genomic  
453 selection of sires for the insemination of cows; GT-BD = genomic selection of sires for the insemination of bull-dams;  
454 GT = genomic selection of sires for the insemination of cows and bull-dams. Subscript numbers indicate standard  
455 deviation across simulation replicates. Lower-case letters denote statistically significant differences between breeding  
456 programs and upper-case letters between sire selection and usage scenarios.

24

458 Table S2: Accuracy of selection by animal category, by breeding program and by sire selection and  
 459 their usage scenario.

| Breeding program | Sire selection and usage  |                          |                          |
|------------------|---------------------------|--------------------------|--------------------------|
|                  | 5 sires/year, use 5 years | 5 sires/year, use 1 year | 1 sire/year, use 5 years |
| <b>PT</b>        |                           |                          |                          |
| young bulls      | 0.31 <sub>0.18</sub>      | 0.23 <sub>0.20</sub>     | 0.30 <sub>0.19</sub>     |
| sires            | 0.88 <sub>0.10</sub>      | 0.87 <sub>0.10</sub>     | 0.82 <sub>0.17</sub>     |
| heifers          | 0.35 <sub>0.05</sub>      | 0.32 <sub>0.06</sub>     | 0.36 <sub>0.06</sub>     |
| <b>GT-PT</b>     |                           |                          |                          |
| young bulls      | 0.80 <sub>0.11</sub>      | 0.78 <sub>0.12</sub>     | 0.80 <sub>0.11</sub>     |
| sires            | 0.82 <sub>0.16</sub>      | 0.83 <sub>0.15</sub>     | 0.78 <sub>0.20</sub>     |
| heifers          | 0.47 <sub>0.04</sub>      | 0.44 <sub>0.05</sub>     | 0.46 <sub>0.06</sub>     |
| <b>GT-C</b>      |                           |                          |                          |
| young bulls      | 0.81 <sub>0.11</sub>      | 0.80 <sub>0.11</sub>     | 0.82 <sub>0.12</sub>     |
| sires            | 0.89 <sub>0.09</sub>      | 0.90 <sub>0.08</sub>     | 0.87 <sub>0.13</sub>     |
| heifers          | 0.44 <sub>0.05</sub>      | 0.41 <sub>0.05</sub>     | 0.46 <sub>0.07</sub>     |
| <b>GT-BD</b>     |                           |                          |                          |
| young bulls      | 0.77 <sub>0.11</sub>      | 0.78 <sub>0.12</sub>     | 0.77 <sub>0.11</sub>     |
| sires            | 0.84 <sub>0.14</sub>      | 0.82 <sub>0.16</sub>     | 0.80 <sub>0.17</sub>     |
| heifers          | 0.51 <sub>0.06</sub>      | 0.46 <sub>0.06</sub>     | 0.49 <sub>0.06</sub>     |
| <b>GT</b>        |                           |                          |                          |
| young bulls      | 0.79 <sub>0.12</sub>      | 0.75 <sub>0.11</sub>     | 0.80 <sub>0.12</sub>     |
| heifers          | 0.48 <sub>0.05</sub>      | 0.43 <sub>0.06</sub>     | 0.49 <sub>0.07</sub>     |

460 PT = conventional progeny testing; GT-PT = genomic pre-selection of bulls for progeny testing, GT-C = genomic  
 461 selection of sires for the insemination of cows; GT-BD = genomic selection of sires for the insemination of bull-dams;  
 462 GT = genomic selection of sires for the insemination of cows and bull-dams. Subscript numbers indicate standard  
 463 deviation across simulation replicates.



25

464

## REFERENCES

- Boichard, D., V. Ducrocq, and S. Fritz. 2015. Sustainable dairy cattle selection in the genomic era. *J. Anim. Breed. Genet.* 132:135–143. <https://doi.org/10.1111/jbg.12150>
- Clark S. A., J. M. Hickey, H. D. Daetwyler, and J. H. van der Werf. 2012. The importance of information on relatives for the prediction of genomic breeding values and the implications for the makeup of reference data sets in livestock breeding schemes. *Genetics, selection, evolution : GSE*, 44: 4. doi:10.1186/1297-9686-44-4
- Clark S. A., B. P. Kinghorn, J. M. Hickey and J. H. van der Werf. 2013. The effect of genomic information on optimal contribution selection in livestock breeding programs. *Genetics Selection Evolution.* 45:44. <https://doi.org/10.1186/1297-9686-45-44>
- Cole J.B. 2015. A simple strategy for managing many recessive disorders in a dairy cattle breeding program. *Genet. Sel. Evol.* 47:94. <https://doi.org/10.1186/s12711-015-0174-9>
- Daetwyler, H.D., B. Villanueva, P. Bijma, and J. A. Woolliams. 2007. Inbreeding in genome-wide selection. *J. Anim. Breed. Genet.* 124:369–376.
- de Roos, A. P. W., C. Schrooten, R. F. Veerkamp, and J. A. M. van Arendonk. 2011. Effects of genomic selection on genetic improvement, inbreeding, and merit of young versus proven bulls. *J. Dairy Sci.* 94:1559–1567. <https://doi.org/10.3168/jds.2010-3354>
- Doekes H.P., R. F. Veerkamp, P. Bijma, S. J. Hiemstra, and J. J. Windig, J.J. 2018. Trends in genome-wide and region-specific genetic diversity in the Dutch-Flemish Holstein–Friesian breeding program from 1986 to 2015. *Genet. Sel. Evol.* 50:15. <https://doi.org/10.1186/s12711-018-0385-y>
- Ducrocq, V., D. Laloe, M. Swaminathan, X. Rognon, M. Tixier-Boichard, and T. Zerjal. 2018. Genomics for Ruminants in Developing Countries: From Principles to Practice. *Front. Genet.* 9:251. <https://doi.org/10.3389/fgene.2018.00251>

- Falconer, D.S. and T. F. C. Mackay. 1996. Introduction to Quantitative Genetics. 4<sup>th</sup> ed. Longmans Green, Harlow, Essex, UK.
- Faux, A.-M., G. Gorjanc, R. C. Gaynor, M. Battagin, S. M. Edwards, D. L. Wilson, S. J. Hearne, S. Gonen, and J. M. Hickey. 2016. AlphaSim: Software for Breeding Program Simulation. *Plant Genome* 9:1-14. <https://doi.org/10.3835/plantgenome2016.02.0013>
- García-Ruiz, A., J. B. Cole, P. M. VanRaden, G. R. Wiggans, F. J. Ruiz-López, and C. P. V. Tassell. 2016. Changes in genetic selection differentials and generation intervals in US Holstein dairy cattle as a result of genomic selection. *Proc. Natl. Acad. Sci.* 113:e3995–e4004. <https://doi.org/10.1073/pnas.1519061113>
- Gaynor, C. R., G. Gorjanc, A. Bentley, E. Ober, P. Howell, R. Jackson, I. Mackay, Ian and J. M. Hickey. 2016. A Two-Part Strategy for Using Genomic Selection to Develop Inbred Lines. *Crop Science*. 56:2372–2386. doi: 10.2135/cropsci2016.09.0742
- Gorjanc, G., R. C. Gaynor, and J. M. Hickey. 2018. Optimal cross selection for long-term genetic gain in two-part programs with rapid recurrent genomic selection. *Theor. Appl. Genet.* 131:1953–1966. <https://doi.org/10.1007/s00122-018-3125-3>
- Gorjanc, G. and J. M. Hickey. 2018. AlphaMate: a program for optimizing selection, maintenance of diversity and mate allocation in breeding programs. *Bioinformatics* 34:3408–3411. <https://doi.org/10.1093/bioinformatics/bty375>
- Habier D., R. L. Fernando, and J. C. M. Dekkers. 2007. The impact of genetic relationship information on genome-assisted breeding values. *Genetics* 177:2389–2397. <https://doi.org/10.1534/genetics.107.081190>
- Henderson, C. R. 1984. Applications of Linear Models in Animal Breeding. University of Guelph, Ontario, Canada.
- Jenko, J., G. R. Wiggans, T. A. Cooper, S. A. E. Eaglen, W. G. de L. Luff, M. Bichard, R. Pong-Wong, and J. A. Woolliams. 2017. Cow genotyping strategies for genomic selection in a

small dairy cattle population. *J. Dairy Sci.* 100:439–452. <https://doi.org/10.3168/jds.2016-11479>

Jorjani, H. 2012. Genomic evaluation of BSW populations, InterGenomics: Results and Deliverables. *Interbull Bull.* 43:5-8.

Kinghorn, B. P. 2011. An algorithm for efficient constrained mate selection. *Genet. Sel. Evol.* 43:4. <https://doi.org/10.1186/1297-9686-43-4>

Legarra, A., I. Aguilar, and I. Misztal. 2009. A relationship matrix including full pedigree and genomic information. *J. Dairy Sci.* 92:4656–4663. <https://doi.org/10.3168/jds.2009-2061>

Lillehammer, M., T. H. E. Meuwissen, and A. K. Sonesson. 2011. A comparison of dairy cattle breeding designs that use genomic selection. *J. Dairy Sci.* 94:493–500. <https://doi.org/10.3168/jds.2010-3518>

Misztal, I., S. Tsuruta, T. Strabel, B. Auvray, T. Druet, and D. H. Lee. 2002. BLUPF90 and related programs (BGF90). Pages 1-2 in Proc. 7th World Congress on Genetics Applied to Livestock Production, Montpellier, France. Australian Egg Corporation, Hurstville, NSW, Australia.

Pérez-Enciso, M. 1995. Use of the uncertain relationship matrix to compute effective population size. *J. Anim. Breed. Genet.* 112:327–332. <https://doi.org/10.1111/j.1439-0388.1995.tb00574.x>

Pryce, J.E., M. E. Goddard, H. W. Raadsma, and B. J. Hayes. 2010. Deterministic models of breeding scheme designs that incorporate genomic selection. *J. Dairy Sci.* 93:5455–5466. <https://doi.org/10.3168/jds.2010-3256>

Schaeffer, L.R. 2006. Strategy for applying genome-wide selection in dairy cattle. *J. Anim. Breed. Genet.* 123:218–223. <https://doi.org/10.1111/j.1439-0388.2006.00595.x>

- Špehar M., K. Potočnik, G. Gorjanc. 2013. Accuracy of genomic prediction for milk production traits with different approaches in a small population of Slovenian Brown bulls. *Livest. Sci.* 157:421–426. <https://doi.org/10.1016/j.livsci.2013.08.008>
- Thomassen, J.R., C. Egger-Danner, A. Willam, B. Guldbrandtsen, M. S. Lund, M.S., and A. C. Sørensen. 2014. Genomic selection strategies in a small dairy cattle population evaluated for genetic gain and profit. *J. Dairy Sci.* 97:458–470. <https://doi.org/10.3168/jds.2013-6599>
- Vandenplas J. and N. Gengler. 2015. Strategies for comparing and combining different genetic and genomic evaluations: A review. *Livestock Science.* 181:121-130. <https://doi.org/10.1016/j.livsci.2015.09.012>.
- Vandenplas J, M. Špehar, K. Potocnik, N. Gengler and G. Gorjanc. 2017. National single-step genomic method that integrates multi-national genomic information. *J Dairy Sci.* 100:465-478. doi: 10.3168/jds.2016-11733.
- Vandenplas J, M. P. L. Calus and G. Gorjanc. 2018. Genomic Prediction Using Individual-Level Data and Summary Statistics from Multiple Populations. *Genetics.* 210:53-69. doi: 10.1534/genetics.118.301109.
- Wiggans, G.R., J. B. Cole, S. M. Hubbard, and T. S. Sonstegard. 2017. Genomic Selection in Dairy Cattle: The USDA Experience. *Annu. Rev. Anim. Biosci.* 5:309–327. <https://doi.org/10.1146/annurev-animal-021815-111422>
- Woolliams, J.A., P. Berg, B. S. Dagnachew, and T. H. E. Meuwissen. 2015. Genetic contributions and their optimization. *J. Anim. Breed. Genet.* 132:89–99. <https://doi.org/10.1111/jbg.12148>
- Wright, S. 1922. Coefficients of Inbreeding and Relationship. *Am. Nat.* 56:330–338.

29

465 Table 1: Genetic gain in genetic standard deviation units by breeding program and by sire selection  
466 and their usage scenario.

| Breeding program | Sire selection and usage             |                                      |                                      |
|------------------|--------------------------------------|--------------------------------------|--------------------------------------|
|                  | 5 sires/year, use 5 years            | 5 sires/year, use 1 year             | 1 sire/year, use 5 years             |
| PT               | 2.50 <sub>0.22</sub> <sup>a, A</sup> | 2.75 <sub>0.19</sub> <sup>a, B</sup> | 3.03 <sub>0.11</sub> <sup>a, C</sup> |
| GT-PT            | 3.41 <sub>0.14</sub> <sup>b, A</sup> | 3.96 <sub>0.17</sub> <sup>b, B</sup> | 3.84 <sub>0.13</sub> <sup>b, B</sup> |
| GT-C             | 4.05 <sub>0.15c</sub> <sup>, A</sup> | 4.65 <sub>0.21</sub> <sup>c, B</sup> | 4.82 <sub>0.21</sub> <sup>c, B</sup> |
| GT-BD            | 4.20 <sub>0.19</sub> <sup>c, A</sup> | 4.56 <sub>0.25</sub> <sup>c, B</sup> | 4.51 <sub>0.20</sub> <sup>d, B</sup> |
| GT               | 4.84 <sub>0.26</sub> <sup>d, A</sup> | 6.04 <sub>0.27</sub> <sup>d, B</sup> | 5.60 <sub>0.27</sub> <sup>e, C</sup> |

467 PT = conventional progeny testing; GT-PT = genomic pre-selection of bulls for progeny testing, GT-C = genomic  
468 selection of sires for the insemination of cows; GT-BD = genomic selection of sires for the insemination of bull-dams;  
469 GT = genomic selection of sires for the insemination of cows and bull-dams. Subscript numbers indicate standard  
470 deviation across simulation replicates. Lower-case letters denote statistically significant differences between breeding  
471 programs and upper-case letters between sire selection and usage scenarios.

30

472 Table 2: Effective population size at causal loci by breeding program and by sire selection and their  
 473 usage scenario.

| Breeding program | Sire selection and their usage    |                                    |                                  |
|------------------|-----------------------------------|------------------------------------|----------------------------------|
|                  | 5 sires/year, use 5 years         | 5 sires/year, use 1 year           | 1 sire/year, use 5 years         |
| PT               | 172 <sub>48</sub> <sup>a, A</sup> | 184 <sub>57</sub> <sup>a, A</sup>  | 96 <sub>20</sub> <sup>a, B</sup> |
| GT-PT            | 159 <sub>43</sub> <sup>a, A</sup> | 146 <sub>40</sub> <sup>b, A</sup>  | 99 <sub>20</sub> <sup>a, B</sup> |
| GT-C             | 129 <sub>29</sub> <sup>b, A</sup> | 124 <sub>32</sub> <sup>bc, A</sup> | 64 <sub>11</sub> <sup>b, B</sup> |
| GT-BD            | 119 <sub>27</sub> <sup>b, A</sup> | 113 <sub>24</sub> <sup>c, AB</sup> | 93 <sub>24</sub> <sup>a, B</sup> |
| GT               | 90 <sub>14</sub> <sup>c, A</sup>  | 72 <sub>10</sub> <sup>d, A</sup>   | 38 <sub>6</sub> <sup>b, B</sup>  |

474 PT = conventional progeny testing; GT-PT = genomic pre-selection of bulls for progeny testing, GT-C = genomic  
 475 selection of sires for the insemination of cows; GT-BD = genomic selection of sires for the insemination of bull-dams;  
 476 GT = genomic selection of sires for the insemination of cows and bull-dams. Subscript numbers indicate standard  
 477 deviation across simulation replicates. Lower-case letters denote statistically significant differences between breeding  
 478 programs and upper-case letters between sire selection and usage scenarios.

31

479 Table 3: Efficiency of converting genetic variation into gain by breeding program and by sire  
 480 selection and their usage scenario.

| Sire selection and their usage |                                   |                                  |                                   |
|--------------------------------|-----------------------------------|----------------------------------|-----------------------------------|
| Breeding program               | 5 sires/year, use 5 years         | 5 sires/year, use 1 year         | 1 sire/year, use 5 years          |
| PT                             | 77 <sub>17</sub> <sup>a, A</sup>  | 61 <sub>9</sub> <sup>a, B</sup>  | 48 <sub>9</sub> <sup>ab, C</sup>  |
| GT-PT                          | 100 <sub>21</sub> <sup>b, A</sup> | 84 <sub>17</sub> <sup>b, B</sup> | 64 <sub>10</sub> <sup>cd, C</sup> |
| GT-C                           | 98 <sub>20</sub> <sup>b, A</sup>  | 81 <sub>12</sub> <sup>b, B</sup> | 54 <sub>10</sub> <sup>ac, C</sup> |
| GT-BD                          | 93 <sub>19</sub> <sup>bc, A</sup> | 87 <sub>15</sub> <sup>b, A</sup> | 72 <sub>15</sub> <sup>d, B</sup>  |
| GT                             | 84 <sub>11</sub> <sup>ac, A</sup> | 75 <sub>11</sub> <sup>b, A</sup> | 42 <sub>5</sub> <sup>b, B</sup>   |

481 PT = conventional progeny testing; GT-PT = genomic pre-selection of bulls for progeny testing, GT-C = genomic  
 482 selection of sires for the insemination of cows; GT-BD = genomic selection of sires for the insemination of bull-dams;  
 483 GT = genomic selection of sires for the insemination of cows and bull-dams. Subscript numbers indicate standard  
 484 deviation across simulation replicates. Lower-case letters denote statistically significant differences between breeding  
 485 programs and upper-case letters between sire selection and usage scenarios.

486 Table 4: Comparison of breeding programs that use truncation or optimum contribution selection.

| Breeding program               | Genetic gain                      | Sire selection accuracy             | No. sires                         | Years in use                     | Generation interval (sire-sire)  | Generation interval (sire-dam)   | Genic standard deviation           | Rate of coancestry                   | Effective population size       | Conversion efficiency          |
|--------------------------------|-----------------------------------|-------------------------------------|-----------------------------------|----------------------------------|----------------------------------|----------------------------------|------------------------------------|--------------------------------------|---------------------------------|--------------------------------|
| Truncation selection           |                                   |                                     |                                   |                                  |                                  |                                  |                                    |                                      |                                 |                                |
| 5 sires/year, use 5 years, PT  | 2.50 <sub>0.22</sub> <sup>a</sup> | 0.88 <sub>0.10</sub> <sup>a</sup>   | 55 <sub>0.0</sub> <sup>a</sup>    | 2.7 <sub>0.0</sub> <sup>a</sup>  | 9.0 <sub>0.06</sub> <sup>a</sup> | 7.0 <sub>0.05</sub> <sup>a</sup> | 0.97 <sub>0.01</sub> <sup>a</sup>  | 0.003 <sub>0.001</sub> <sup>a</sup>  | 172 <sub>48</sub> <sup>a</sup>  | 77 <sub>17</sub> <sup>a</sup>  |
| 5 sires/year, use 5 years, GT  | 4.84 <sub>0.26</sub> <sup>b</sup> | 0.79 <sub>0.12</sub> <sup>b</sup>   | 56 <sub>0.1</sub> <sup>a</sup>    | 2.1 <sub>0.0</sub> <sup>b</sup>  | 4.2 <sub>0.05</sub> <sup>b</sup> | 3.9 <sub>0.05</sub> <sup>b</sup> | 0.94 <sub>0.01</sub> <sup>b</sup>  | 0.006 <sub>0.001</sub> <sup>b</sup>  | 90 <sub>14</sub> <sup>bc</sup>  | 84 <sub>11</sub> <sup>a</sup>  |
| 5 sires/year, use 1 year, GT   | 6.04 <sub>0.27</sub> <sup>c</sup> | 0.75 <sub>0.11</sub> <sup>c</sup>   | 36 <sub>0.0</sub> <sup>b</sup>    | 1.3 <sub>0.0</sub> <sup>c</sup>  | 2.3 <sub>0.05</sub> <sup>c</sup> | 2.3 <sub>0.00</sub> <sup>c</sup> | 0.92 <sub>0.01</sub> <sup>cd</sup> | 0.007 <sub>0.001</sub> <sup>c</sup>  | 72 <sub>10</sub> <sup>bd</sup>  | 75 <sub>11</sub> <sup>a</sup>  |
| Optimum contribution selection |                                   |                                     |                                   |                                  |                                  |                                  |                                    |                                      |                                 |                                |
| OCS <sub>45°</sub>             | 6.26 <sub>0.39</sub> <sup>c</sup> | 0.77 <sub>0.02</sub> <sup>bc</sup>  | 9.6 <sub>0.6</sub> <sup>c</sup>   | 1.6 <sub>0.06</sub> <sup>d</sup> | 2.8 <sub>0.07</sub> <sup>d</sup> | 2.7 <sub>0.07</sub> <sup>d</sup> | 0.91 <sub>0.01</sub> <sup>c</sup>  | 0.008 <sub>0.001</sub> <sup>d</sup>  | 61 <sub>10</sub> <sup>d</sup>   | 72 <sub>8</sub> <sup>a</sup>   |
| OCS <sub>50°</sub>             | 6.10 <sub>0.23</sub> <sup>c</sup> | 0.79 <sub>0.02</sub> <sup>abc</sup> | 14.3 <sub>0.9</sub> <sup>c</sup>  | 1.7 <sub>0.05</sub> <sup>d</sup> | 2.9 <sub>0.07</sub> <sup>e</sup> | 2.8 <sub>0.05</sub> <sup>e</sup> | 0.93 <sub>0.01</sub> <sup>d</sup>  | 0.007 <sub>0.001</sub> <sup>bc</sup> | 75 <sub>9</sub> <sup>bcd</sup>  | 87 <sub>11</sub> <sup>a</sup>  |
| OCS <sub>55°</sub>             | 5.27 <sub>0.28</sub> <sup>d</sup> | 0.79 <sub>0.02</sub> <sup>abc</sup> | 25.1 <sub>4.7</sub> <sup>d</sup>  | 2.1 <sub>0.17</sub> <sup>b</sup> | 3.0 <sub>0.07</sub> <sup>f</sup> | 2.9 <sub>0.06</sub> <sup>f</sup> | 0.95 <sub>0.01</sub> <sup>be</sup> | 0.005 <sub>0.001</sub> <sup>e</sup>  | 113 <sub>22</sub> <sup>ce</sup> | 115 <sub>24</sub> <sup>b</sup> |
| OCS <sub>60°</sub>             | 4.77 <sub>0.25</sub> <sup>b</sup> | 0.81 <sub>0.02</sub> <sup>abc</sup> | 49.0 <sub>8.9</sub> <sup>e</sup>  | 3.0 <sub>0.34</sub> <sup>e</sup> | 3.3 <sub>0.10</sub> <sup>g</sup> | 3.1 <sub>0.07</sub> <sup>g</sup> | 0.96 <sub>0.01</sub> <sup>ae</sup> | 0.004 <sub>0.001</sub> <sup>ae</sup> | 144 <sub>24</sub> <sup>e</sup>  | 126 <sub>17</sub> <sup>b</sup> |
| OCS <sub>75°</sub>             | 3.03 <sub>0.17</sub> <sup>e</sup> | 0.82 <sub>0.01</sub> <sup>abc</sup> | 153.0 <sub>9.1</sub> <sup>f</sup> | 4.9 <sub>0.07</sub> <sup>f</sup> | 4.2 <sub>0.08</sub> <sup>b</sup> | 4.0 <sub>0.06</sub> <sup>h</sup> | 0.98 <sub>0.00</sub> <sup>f</sup>  | 0.002 <sub>0.001</sub> <sup>f</sup>  | 276 <sub>43</sub> <sup>f</sup>  | 162 <sub>37</sub> <sup>c</sup> |

487 PT = conventional progeny testing; GT = genomic selection of sires for the insemination of cows and bull-dams; OCS<sub>x°</sub> = optimum contribution selection of sires for the  
488 insemination of cows and bull-dams with the target degrees of X°. Subscript numbers indicate standard deviation across simulation replicates. Lower-case letters denote statistically  
489 significant differences between breeding programs.



34

Obšteter et al., 1

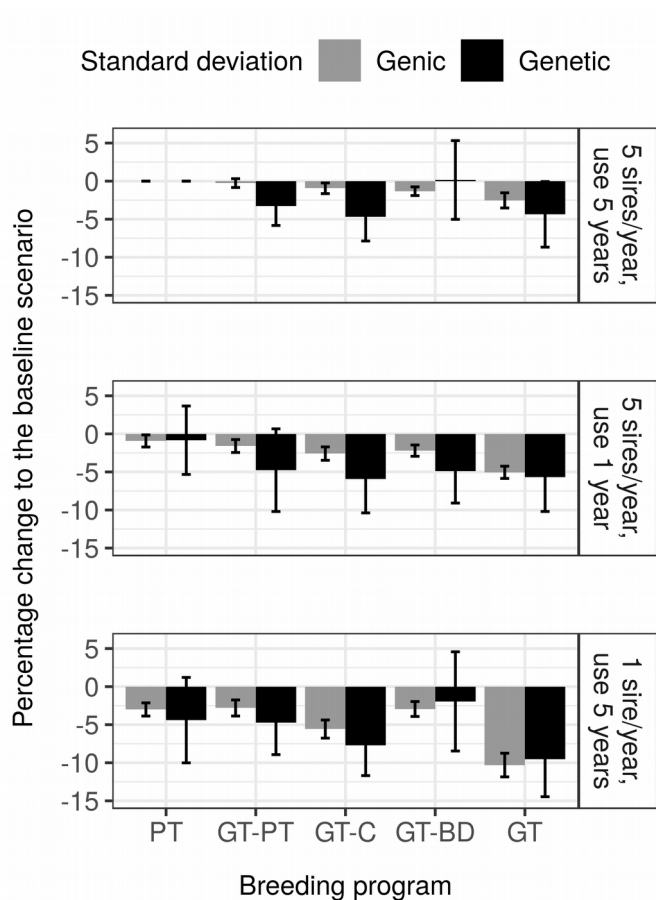

491

492 Figure 1: Genic and genetic standard deviation by breeding program and by sire selection and their  
 493 usage scenario expressed as percentage change to the baseline that had in the final generation genic  
 494 standard deviation of 0.97 and genetic standard deviation of 0.94. PT = conventional progeny testing; GT-  
 495 PT = genomic pre-selection of bulls for progeny testing, GT-C = genomic selection of sires for the insemination of  
 496 cows; GT-BD = genomic selection of sires for the insemination of bull-dams; GT = genomic selection of sires for the  
 497 insemination of cows and bull-dams.

35

498 Obšteter et al., 2

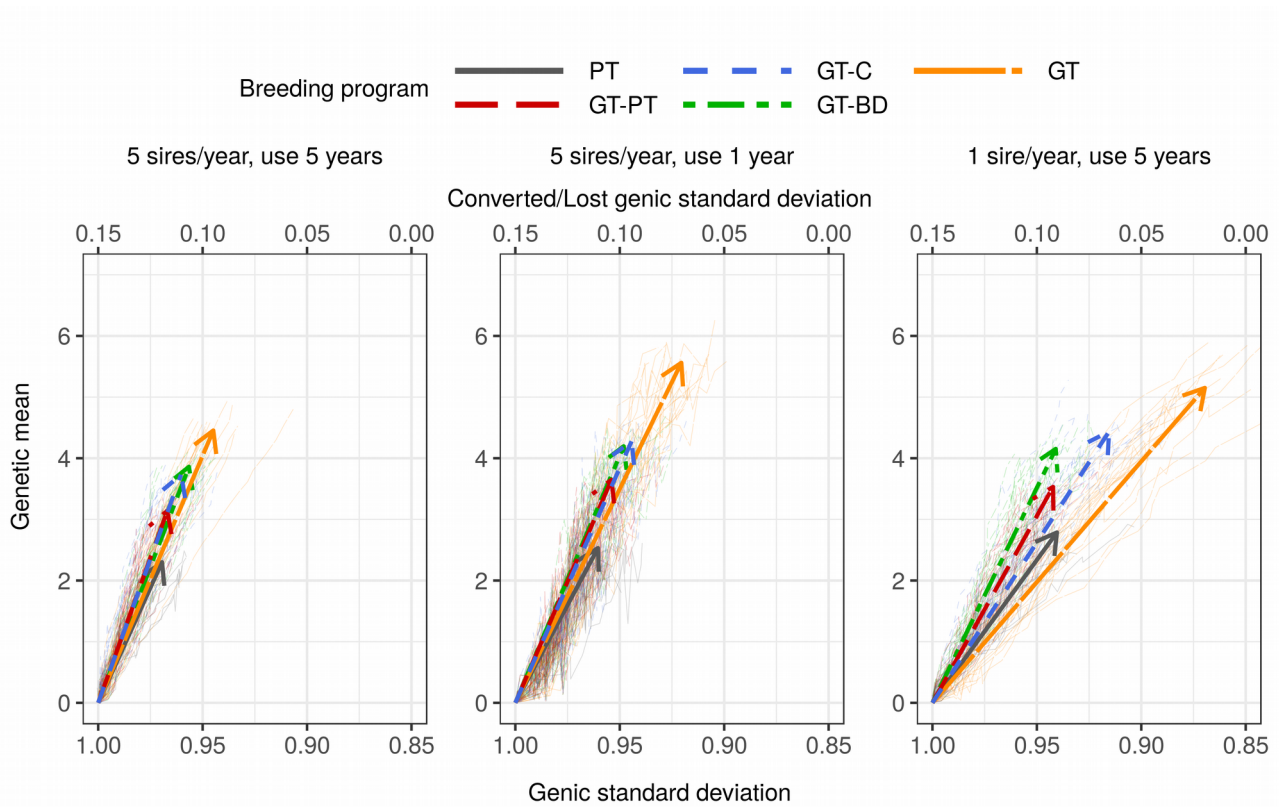

499

500 Figure 2: Change of genetic mean and genic standard deviation over the 20 years of selection by  
501 breeding program and by sire selection and their usage scenario. Thin lines represent individual  
502 replicates, while thick lines represent average linear regression with arrows pointing in the direction  
503 of change. PT = conventional progeny testing; GT-PT = genomic pre-selection of bulls for progeny testing, GT-C =  
504 genomic selection of sires for the insemination of cows; GT-BD = genomic selection of sires for the insemination of  
505 bull-dams; GT = genomic selection of sires for the insemination of cows and bull-dams.

36

506 Obšteter et al., 3

507

508

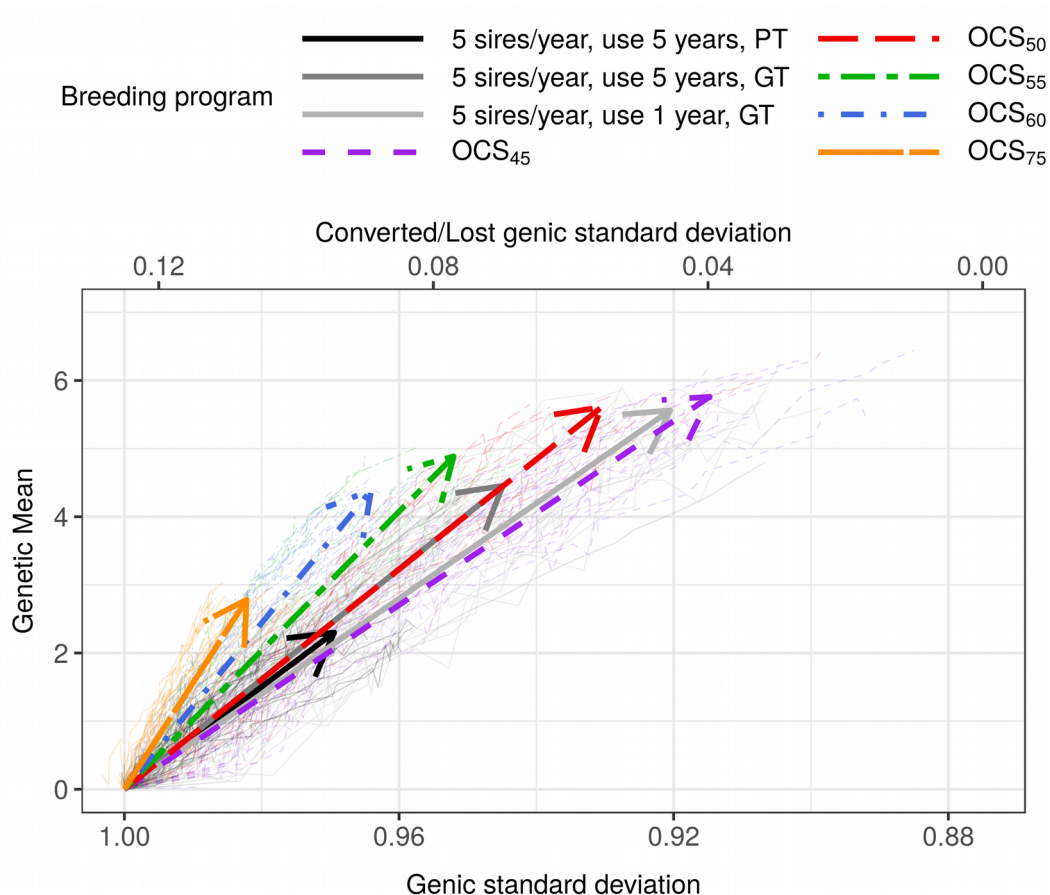

509 Figure 3: Change of genetic mean and genic standard deviation over the 20 years of selection for  
510 fixed or optimized breeding programs. Thin lines represent individual replicates, while thick lines  
511 represent average linear regression with arrows pointing in the direction of change. PT = conventional  
512 progeny testing; GT = genomic selection of sires for the insemination of cows and bull-dams; OCS<sub>X°</sub> = optimum  
513 contribution selection of sires for the insemination of cows and bull-dams with the target degrees of X°.
